# Supplementary material for: Lycium barbarum Polysaccharides and Capsaicin Inhibit Oxidative Stress, Inflammatory Responses, and Pain Signaling in Rats with Dextran Sulfate Sodium-Induced Colitis
Source: MDPI journal article supplement (doi:10.3390/ijms23052423), 2022-02-22
Supplement: s1 [file s1]

**Table S1.** Definition of disease activity index score.

| <b>Score</b> | <b>Change of Body Weight</b> | <b>Fecal Consistency</b> | <b>Fecal Occult Blood</b> |
|--------------|------------------------------|--------------------------|---------------------------|
| 0            | No changes or increases      | Normal stiffness         | No blood                  |
| 1            | Loss 1%-5%                   | Semi loose +             | Occult blood +            |
| 2            | Loss 5%-10%                  | Semi loose ++            | Occult blood ++           |
| 3            | Loss 10%-15%                 | Loose                    | Bloody feces +            |
| 4            | Loss >15%                    | Diarrhea                 | Bloody feces ++           |

**Table S2.** Definition of histological scores.

| Score | Abnormality of Mucosal Architecture                                    | Extent of Inflammation                                                 | Erosion or Ulceration                                         | Epithelial Regeneration                  | Percent of Involvement |
|-------|------------------------------------------------------------------------|------------------------------------------------------------------------|---------------------------------------------------------------|------------------------------------------|------------------------|
| 0     | No changes                                                             | No infiltration                                                        | No ulceration                                                 | Complete structure                       | -                      |
| 1     | Structure slightly regional abnormality, but not affect lamina propria | Slight and regional inflammation (<10%)                                | Slight and regional, did not penetrate through lamina propria | Most tissues were regenerated            | 1%-25%                 |
| 2     | Slight abnormality of structure and glands, extension of cystic lesion | Slight inflammation (10%-25%)                                          | Obvious damage                                                | Regeneration of gland structure          | 26%-50%                |
| 3     | Moderate abnormality, multiple abnormal lesion                         | Moderate inflammation, neutrophil infiltrate in submucosa              | Moderate ulceration                                           | Incomplete structure of epithelial layer | 51%-75%                |
| 4     | Severe lesion, loss of glands and epithelial structure                 | Severe inflammation, neutrophil infiltrate from mucosa to serosa layer | Severe damage and formation of granulation tissue             | No regeneration of tissue                | 76%-100%               |
